# Supplementary material for: The phase diagram of a mixed halide (Br, I) hybrid perovskite obtained by synchrotron X-ray diffraction
Source: Royal Society of Chemistry journal article supplement (doi:10.1039/c8ra09398a), 2019-01-01
Supplement: c8ra09398a1.pdf [file c8ra09398a1.pdf]

**The phase diagram of mixed halide (Br, I) hybrid perovskites  
obtained by synchrotron X-ray diffraction**

*Frederike Lehmann<sup>\*ab</sup> Alexandra Franz<sup>a</sup> Daniel M. Többens<sup>a</sup> Sergej Levchenko<sup>a</sup> Thomas Unold<sup>a</sup> Andreas Taubert<sup>b</sup> and Susan Schorr<sup>ac</sup>*

<sup>a</sup>Helmholtz-Zentrum Berlin für Materialien und Energie, Hahn-Meitner Platz 1, 14109 Berlin, Germany.

<sup>b</sup>University of Potsdam, Institute of Chemistry, Karl-Liebknecht-Straße 24-25, 14476 Potsdam OT Golm, Germany

<sup>c</sup>Free University Berlin, Department of Geoscience, Malteserstr. 74-100, 12249 Berlin, Germany

\*Corresponding author, email: [susan.schorr@helmholtz-berlin.de](mailto:susan.schorr@helmholtz-berlin.de)

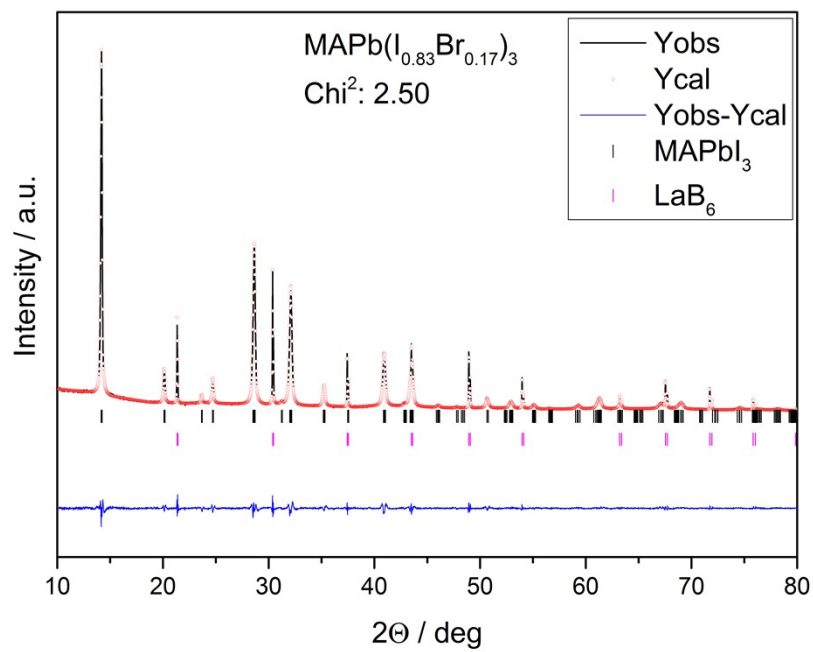

Figure S1 | Le Bail refinement of the powder pattern of the MAPb(I<sub>0.83</sub>Br<sub>0.17</sub>)<sub>3</sub> solid solution

**Table S1 | Total composition, lattice parameters (tetragonal for iodine rich compositions; cubic for bromine rich compositions) and single or multiple phases**

| Total composition                                        | single/<br>multiple<br>phases | Pseudo cubic<br><a> lattice<br>parameter [Å] | Tetragonal a lattice<br>parameter [Å] | Tetragonal c<br>lattice<br>parameter [Å] | Cubic a lattice<br>parameter [Å] |
|----------------------------------------------------------|-------------------------------|----------------------------------------------|---------------------------------------|------------------------------------------|----------------------------------|
| MAPbI <sub>3</sub>                                       | single                        | 6.292 ± 0.001                                | 8.8691(06)                            | 12.6675(1)                               | -                                |
| MAPb(I <sub>0.9</sub> Br <sub>0.1</sub> ) <sub>3</sub>   | single                        | 6.264 ± 0.001                                | 8.8395(09)                            | 12.5847(2)                               | -                                |
| MAPb(I <sub>0.87</sub> Br <sub>0.13</sub> ) <sub>3</sub> | single                        | 6.245 ± 0.001                                | 8.8188(2)                             | 12.5247(4)                               | -                                |
| MAPb(I <sub>0.83</sub> Br <sub>0.17</sub> ) <sub>3</sub> | single                        | 6.232 ± 0.001                                | 8.8051(2)                             | 12.4903(4)                               | -                                |
| MAPb(I <sub>0.8</sub> Br <sub>0.2</sub> ) <sub>3</sub>   | single                        | 6.223 ± 0.001                                | 8.7991(3)                             | 12.4518(4)                               | -                                |
| MAPb(I <sub>0.77</sub> Br <sub>0.23</sub> ) <sub>3</sub> | single                        | 6.211 ± 0.001                                | 8.7837(2)                             | 12.4194(1)                               | -                                |
| MAPb(I <sub>0.74</sub> Br <sub>0.26</sub> ) <sub>3</sub> | single                        | 6.192 ± 0.001                                | 8.7590(2)                             | 12.3820(3)                               | -                                |
| MAPb(I <sub>0.7</sub> Br <sub>0.3</sub> ) <sub>3</sub>   | multiple                      | 6.209 ± 0.01                                 | 8.8122(2)                             | 12.3318(7)                               | 6.0939(3)                        |
| MAPb(I <sub>0.6</sub> Br <sub>0.4</sub> ) <sub>3</sub>   | multiple                      | 6.188 ± 0.01                                 | 8.7680(05)                            | 12.3286(2)                               | 6.0645(3)                        |
| MAPb(I <sub>0.5</sub> Br <sub>0.5</sub> ) <sub>3</sub>   | multiple                      | 6.155 ± 0.01                                 | 8.7544(4)                             | 12.1681(13)                              | 5.9995(2)                        |
| MAPb(I <sub>0.4</sub> Br <sub>0.6</sub> ) <sub>3</sub>   | multiple                      | 6.147 ± 0.01                                 | 8.7477(4)                             | 12.1411(7)                               | 5.9957(2)                        |
| MAPb(I <sub>0.3</sub> Br <sub>0.7</sub> ) <sub>3</sub>   | multiple                      | 6.067 ± 0.01                                 | 8.6017(10)                            | 12.0702(16)                              | 5.9898(2)                        |
| MAPb(I <sub>0.2</sub> Br <sub>0.8</sub> ) <sub>3</sub>   | multiple                      | 6.017 ± 0.01                                 | 8.5115(20)                            | 12.0250(12)                              | 5.9690(1)                        |
| MAPb(I <sub>0.13</sub> Br <sub>0.87</sub> ) <sub>3</sub> | multiple                      | 5.995 ± 0.01                                 | 8.4815(6)                             | 11.9833(10)                              | 5.9596(07)                       |
| MAPb(I <sub>0.1</sub> Br <sub>0.9</sub> ) <sub>3</sub>   | multiple                      | 5.935 ± 0.01                                 | 8.3914(1)                             | 11.8781(12)                              | 5.9420(06)                       |
| MAPb(I <sub>0.05</sub> Br <sub>0.95</sub> ) <sub>3</sub> | single                        | -                                            | -                                     | -                                        | 5.9385(04)                       |
| MAPbBr <sub>3</sub>                                      | single                        | -                                            | -                                     | -                                        | 5.9293 (02)                      |

**Table S2 | Total composition, weight fractions of iodine rich phase (Both phase compositions of iodine and bromine at up to 100% in all cases.) and site occupancy factors (S.O.F.) for bromine in iodine rich- and bromine rich phase**

| Total composition                                        | weight fraction<br>iodine rich<br>phase<br>% | S.O.F.<br>bromine in<br>iodine rich<br>phase | Error S.O.F.<br>bromine in<br>iodine rich<br>phase | S.O.F.<br>bromine in<br>bromine rich<br>phase | Error S.O.F.<br>bromine in<br>bromine rich<br>phase |
|----------------------------------------------------------|----------------------------------------------|----------------------------------------------|----------------------------------------------------|-----------------------------------------------|-----------------------------------------------------|
| MAPbI <sub>3</sub>                                       | 100.00 (0.81)                                | 0.000                                        | -                                                  | -                                             | -                                                   |
| MAPb(I <sub>0.9</sub> Br <sub>0.1</sub> ) <sub>3</sub>   | 100.00 (0.79)                                | 0.068                                        | 0.007                                              | -                                             | -                                                   |
| MAPb(I <sub>0.87</sub> Br <sub>0.13</sub> ) <sub>3</sub> | 100.00 (0.69)                                | 0.164                                        | 0.007                                              | -                                             | -                                                   |
| MAPb(I <sub>0.83</sub> Br <sub>0.17</sub> ) <sub>3</sub> | 100.00 (0.64)                                | 0.243                                        | 0.006                                              | -                                             | -                                                   |
| MAPb(I <sub>0.8</sub> Br <sub>0.2</sub> ) <sub>3</sub>   | 100.00 (0.70)                                | 0.292                                        | 0.007                                              | -                                             | -                                                   |
| MAPb(I <sub>0.77</sub> Br <sub>0.23</sub> ) <sub>3</sub> | 100.00 (0.66)                                | 0.295                                        | 0.005                                              | -                                             | -                                                   |
| MAPb(I <sub>0.74</sub> Br <sub>0.26</sub> ) <sub>3</sub> | 100.00 (0.57)                                | 0.358                                        | 0.005                                              | -                                             | -                                                   |
| MAPb(I <sub>0.7</sub> Br <sub>0.3</sub> ) <sub>3</sub>   | 71.53 (1.85)                                 | 0.183                                        | 0.014                                              | 0.647                                         | 0.037                                               |
| MAPb(I <sub>0.6</sub> Br <sub>0.4</sub> ) <sub>3</sub>   | 82.15 (2.76)                                 | 0.283                                        | 0.031                                              | 0.993                                         | 0.051                                               |
| MAPb(I <sub>0.5</sub> Br <sub>0.5</sub> ) <sub>3</sub>   | 73.27 (1.41)                                 | 0.332                                        | 0.020                                              | 1.000                                         | -                                                   |
| MAPb(I <sub>0.4</sub> Br <sub>0.6</sub> ) <sub>3</sub>   | 73.62 (2.37)                                 | 0.274                                        | 0.033                                              | 1.000                                         | -                                                   |
| MAPb(I <sub>0.3</sub> Br <sub>0.7</sub> ) <sub>3</sub>   | 65.34 (2.82)                                 | 0.492                                        | 0.028                                              | 1.000                                         | -                                                   |
| MAPb(I <sub>0.2</sub> Br <sub>0.8</sub> ) <sub>3</sub>   | 46.57 (1.57)                                 | 0.801                                        | 0.016                                              | 1.000                                         | -                                                   |
| MAPb(I <sub>0.13</sub> Br <sub>0.87</sub> ) <sub>3</sub> | 63.26 (1.39)                                 | 0.718                                        | 0.011                                              | 0.992                                         | 0.019                                               |
| MAPb(I <sub>0.1</sub> Br <sub>0.9</sub> ) <sub>3</sub>   | 20.15 (1.83)                                 | 0.718                                        | 0.000                                              | 1.000                                         | -                                                   |
| MAPb(I <sub>0.05</sub> Br <sub>0.95</sub> ) <sub>3</sub> | 0.00                                         | 0.000                                        | -                                                  | 1.000                                         | -                                                   |
| MAPbBr <sub>3</sub>                                      | 0.00                                         | 0.000                                        | -                                                  | 0.990                                         | 0.012                                               |

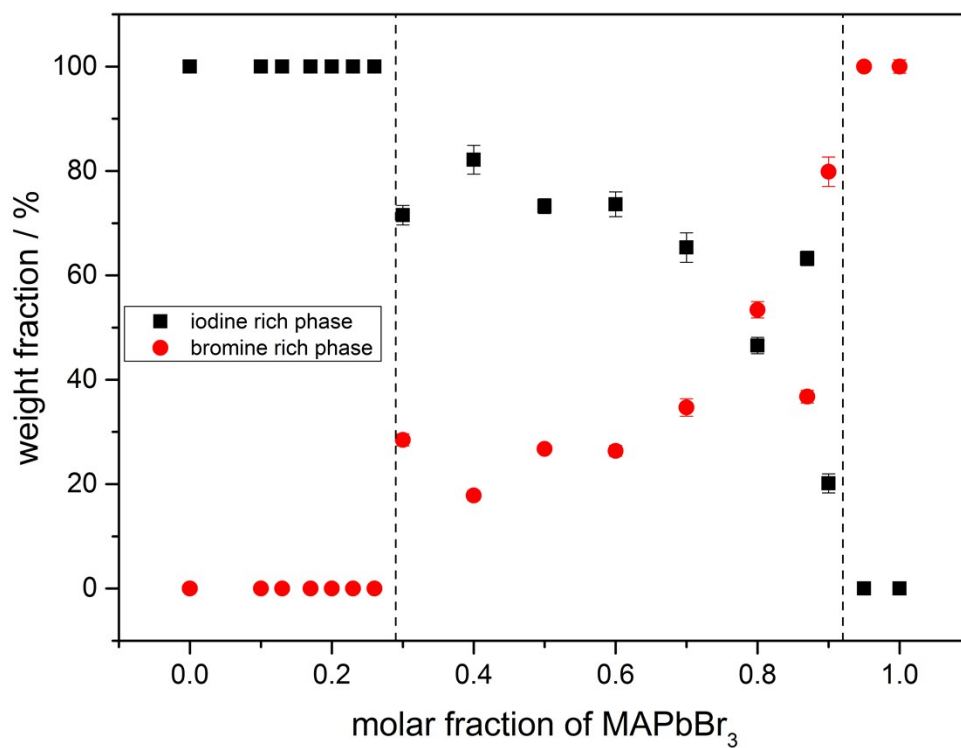

Figure S2 | Weight fractions of the iodine and bromine rich phases received by Rietveld refinement of the powder pattern of the MAPb(I<sub>1-x</sub>Br<sub>x</sub>)<sub>3</sub> solid solution (black rectangles for iodine rich phase, red circles for bromine rich phase)

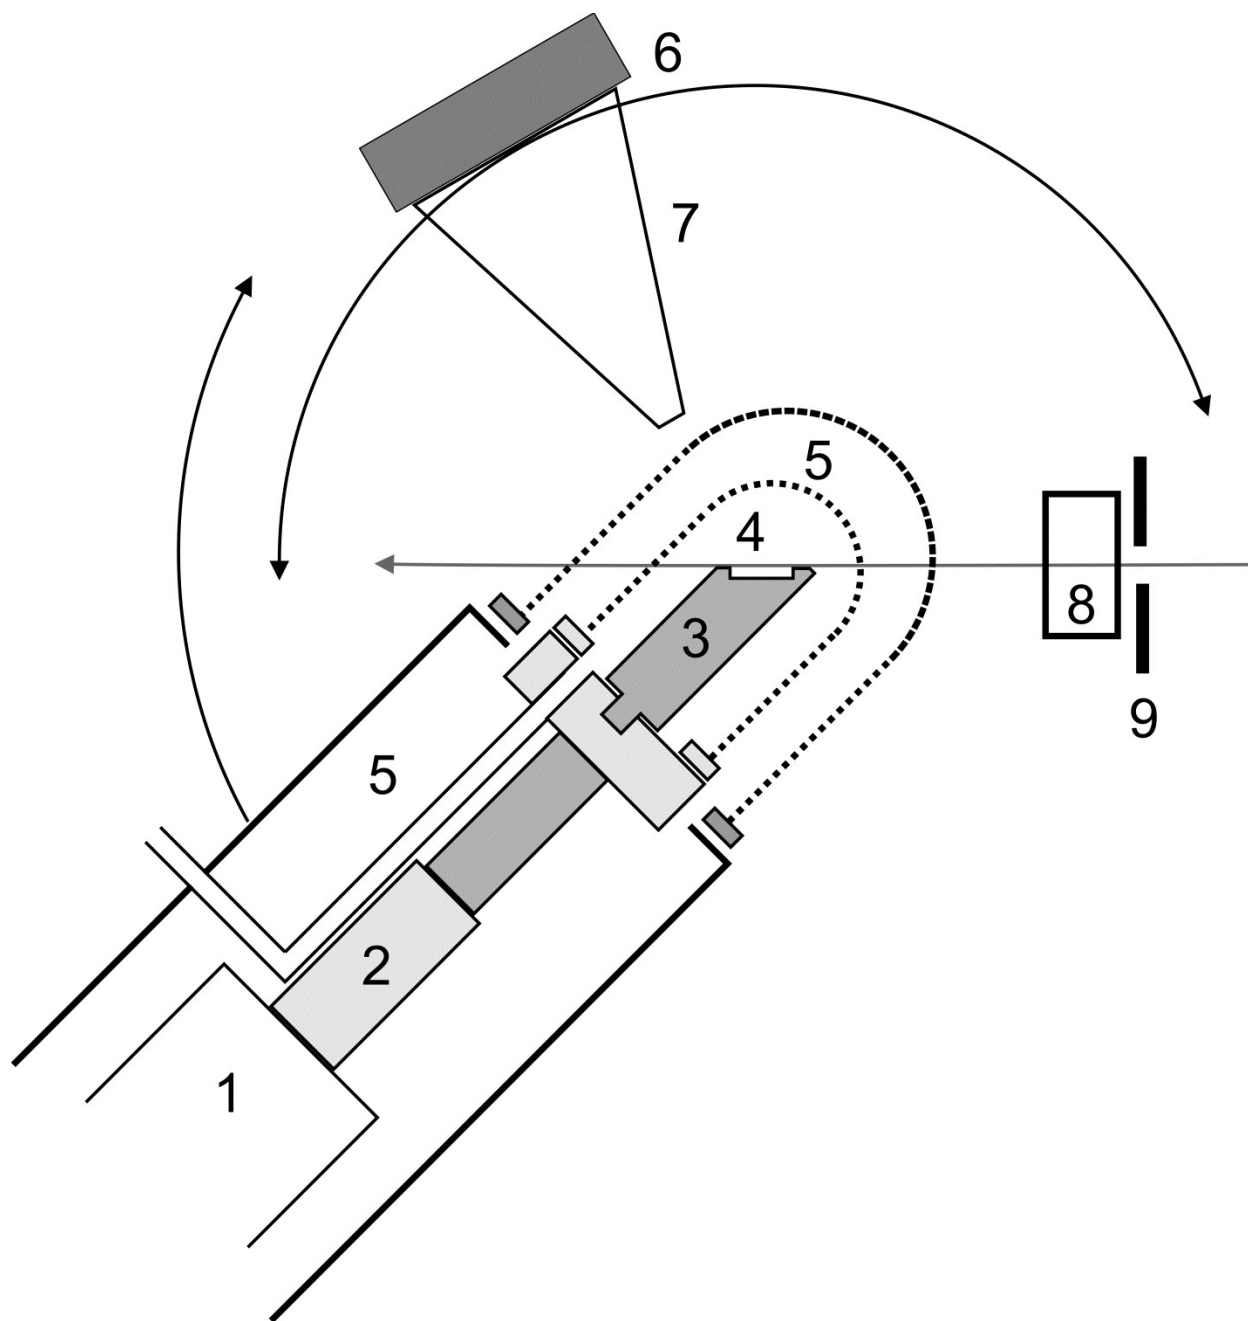

Figure S3| Sketch of the low temperature synchrotron X-ray diffraction setup at the KMC-2 beamline (BESSY II) (Gifford-McMahon closed-cycle cryo-cooler (1) equipped with additional high temperature stage (2), sample holder (3) for reflection in He-exchange gas cell (4), with double Kapton dome providing isolation vacuum (5). Mounted in Eulerian cradle of KMC-2 goniometer (not to scale), with Vantec 2000 area detector (6) with anti-scattering cone (7), monitor counter (8) and primary beam slits (9) indicated. Operated in symmetric reflection geometry.)<sup>[1]</sup>

References:

[1] V. Bon *et al.*, *Microporous and Mesoporous Materials* 188 (2014) 190–195.
